# Supplementary material for: Room temperature continuous flow synthesis of γ-valerolactone and N-containing heterocycles over Ru supported bimodal N,S-doped cubic mesoporous carbon
Source: Royal Society of Chemistry journal article supplement (doi:10.1039/d3gc01415k), 2023-01-01
Supplement: d3gc01415k1.pdf [file d3gc01415k1.pdf]

## Supporting Information

Room temperature continuous flow synthesis of  $\gamma$ -valerolactone and N-containing heterocycles over  
a Ru supported on a bimodal N, S-doped cubic mesoporous carbon

Hamzeh H. Veisi,<sup>a, b</sup> Babak Karimi,<sup>\*a, c</sup> Mohsen Heydari,<sup>a</sup> Rafael Luque<sup>b, d\*</sup>

- 
- a Department of Chemistry, Institute for Advanced Studies in Basic Sciences (IASBS), PO. Box 45195-1159, Prof. Sobouti Boulevard, Zanjan 45137-66731, Iran.  
b Departamento de Química Orgánica, Universidad de Córdoba, Edificio Marie Curie (C-3), Ctra Nnal IV-A, Km 396, E-14014 Córdoba, Spain.  
c Research Center for Basic Sciences & Modern Technologies (RBST), Institute for Advanced Studies in Basic Sciences (IASBS), Prof. Sobouti Boulevard, Zanjan 45137-66731, Iran.  
d Universidad ECOTEC, Km. 13.5 Samborondón, Samborondón, EC092302, Ecuador.

\*Corresponding authors: E-mail: [rafael.luque@uco.es](mailto:rafael.luque@uco.es); [karimi@iasbs.ac.ir](mailto:karimi@iasbs.ac.ir).

---

## Table of Contents

|                                                                                                            |   |
|------------------------------------------------------------------------------------------------------------|---|
| General procedure for the continuous conversion of levulinic acid into gamma valerolactone reactions ..... | 3 |
| The operation of the H-Cube mini plus without hydrogen gas .....                                           | 3 |
| The analysis of reaction mixtures with GC-MS and GC-FID .....                                              | 3 |
| Calculation of Weight Hourly Space Velocity (WHSV) and space time yield (STY) .....                        | 4 |

## Figures

Figure S 1. A) N<sub>2</sub> adsorption-desorption isotherms, and pore size distribution curves (evaluated using the DH method) of the synthesized carbon and catalyst (the orange diagram for IBOMC; the blue diagram for Ru@IBOMC), B) TEM of Ru@IBOMC .....5  
Figure S 2: A) t-plot of Ru@IBOMC, B) NLDFT of Ru@IBOMC with PSD of  $r_{p,peak} = 3.95$  nm and 4.82 nm, C) BJH of the catalyst, D) alpha-plot of the catalyst. ....6  
Figure S 3. Low angle XRD of IBOMC .....7  
Figure S 4: Elemental mapping images of Ru@IBOMC: Dispersion of Carbon element (A), Nitrogen element (B) Sulfur element (C) Oxygen element (D) Ruthenium element (E), and the combine of all elements (F) on the surface of Ru@IBOMC; EDX analysis of Ru@IBOMC (G);

|                                                                                                                                                                                                                                                                                                                                                                                                                                                                                                                                                             |    |
|-------------------------------------------------------------------------------------------------------------------------------------------------------------------------------------------------------------------------------------------------------------------------------------------------------------------------------------------------------------------------------------------------------------------------------------------------------------------------------------------------------------------------------------------------------------|----|
| SEM of Ru@IBOMC (H). .....                                                                                                                                                                                                                                                                                                                                                                                                                                                                                                                                  | 9  |
| Figure S 5: CO <sub>2</sub> and NH <sub>3</sub> TPDs of IBOMC.....                                                                                                                                                                                                                                                                                                                                                                                                                                                                                          | 10 |
| Figure S 6: FT-IR of IBOMC.....                                                                                                                                                                                                                                                                                                                                                                                                                                                                                                                             | 11 |
| Figure S 7: XPS of Ru@IBOMC.....                                                                                                                                                                                                                                                                                                                                                                                                                                                                                                                            | 12 |
| Figure S 8: XPS of Ru@IBOMC.....                                                                                                                                                                                                                                                                                                                                                                                                                                                                                                                            | 13 |
| Figure S 9: TGA analyses of Ru@IBOMC and used Ru@IBOMC .....                                                                                                                                                                                                                                                                                                                                                                                                                                                                                                | 14 |
| Figure S 10: A) t-plot of used-Ru@IBOMC, B) NLDFT of used-catalyst with PSD of $r_{p,peak} = 3.95$ nm and 4.82 nm, C) BJH of used-catalyst, D) N <sub>2</sub> adsorption-desorption isotherms of used-catalyst. ....                                                                                                                                                                                                                                                                                                                                        | 15 |
| Figure S 11. Detection of GVL using GC Mass for conversion of LA into GVL, and reaction of LA with aniline at 90 °C.....                                                                                                                                                                                                                                                                                                                                                                                                                                    | 16 |
| Figure S 12. Detection of 5-methyl-1-phenylpyrrolidin-2-one using GC Mass in conversion of LA with aniline at 30 °C.....                                                                                                                                                                                                                                                                                                                                                                                                                                    | 16 |
| Figure S 13. Detection of aromatic lactam using GC Mass in conversion of LA with aniline at 90 °C .....                                                                                                                                                                                                                                                                                                                                                                                                                                                     | 17 |
| Figure S 14. Detection of 4-(phenylimino)pentanoic acid using GC Mass in conversion of LA with aniline at 30 °C.....                                                                                                                                                                                                                                                                                                                                                                                                                                        | 17 |
| Figure S 15. Detection of 4-(phenylamino)pentanoic acid using GC Mass in conversion of LA with aniline at 30 °C.....                                                                                                                                                                                                                                                                                                                                                                                                                                        | 18 |
| Figure S 16. Detection of 5-methyl-1-phenyl-1,3-dihydro-2H-pyrrol-2-one using GC Mass in conversion of LA with aniline at 30 °C .....                                                                                                                                                                                                                                                                                                                                                                                                                       | 18 |
| Figure S 17. Detection of 1-ethyl-5-methylpyrrolidin-2-one with GC Mass in conversion of LA with acetonitrile.....                                                                                                                                                                                                                                                                                                                                                                                                                                          | 19 |
| Figure S 18. Detection of 1-ethyl-5-methyl-1,3-dihydro-2H-pyrrol-2-one with GC Mass in conversion of LA with acetonitrile.....                                                                                                                                                                                                                                                                                                                                                                                                                              | 19 |
| Figure S 19: Chromatogram of standard Levulinic acid in GC-FID.....                                                                                                                                                                                                                                                                                                                                                                                                                                                                                         | 20 |
| Figure S 20: GVL Calibration curve using GC-FID .....                                                                                                                                                                                                                                                                                                                                                                                                                                                                                                       | 20 |
| Figure S 21: Chromatogram of mixture of reaction after hydrogenation of Levulinic acid at room temperature in GC-FID .....                                                                                                                                                                                                                                                                                                                                                                                                                                  | 21 |
| Figure S 22: Chromatogram of mixture of reaction after hydrogenation of Levulinic acid at 90 °C in GC-FID .....                                                                                                                                                                                                                                                                                                                                                                                                                                             | 21 |
| Figure S 23: Chromatogram of mixture of reaction after hydrogenation of Levulinic acid at H <sub>2</sub> -free conditions in GC-FID.....                                                                                                                                                                                                                                                                                                                                                                                                                    | 22 |
| Figure S 24: Chromatogram of mixture of reaction after hydrogenation of Levulinic acid in GC-MS .....                                                                                                                                                                                                                                                                                                                                                                                                                                                       | 22 |
| Figure S 25: A) Chromatogram of mixture of reaction after hydrogenation of Levulinic acid in the presence of Aniline at 90 °C using GC-MS; B) Chromatogram of mixture of reaction after hydrogenation of Levulinic acid 90 °C in the presence of Aniline and triethylamine as STD in GC-MS; C) Chromatogram of mixture of reaction after hydrogenation of Levulinic acid in the presence of Aniline using GC-FID; D) Chromatogram of mixture of reaction after hydrogenation of Levulinic acid in the presence of Aniline and TEA as STD using GC-FID. .... | 23 |
| Figure S 26: Chromatogram of mixture of reaction after hydrogenation of Levulinic acid in the presence of MeCN using GC-MS .....                                                                                                                                                                                                                                                                                                                                                                                                                            | 24 |

General procedure for the continuous conversion of levulinic acid into gamma valerolactone reactions

Flow reactions were conducted using an H-Cube instrument from Thalesnano Inc. equipped with a back-pressure regulator. Various concentrations of LA or methyl levulinates (0.1 to 3 M) were passed at a flow rate of 0.1 mL.min<sup>-1</sup> through a fixed bed at different temperatures (30-90 °C) containing 0.1 g catalyst under different hydrogen pressure (10-60 bar). The identity of the products was confirmed by GC-MS. Response factors of reaction products were determined by GC analysis using standard compounds in calibration mixtures of specified compositions.

### **The operation of the H-Cube mini plus without hydrogen gas**

H-Cube Mini Plus can work in hydrogen mode ON for hydrogenations, or hydrogen mode OFF for catalytic reactions that do not require hydrogen. In the absence of hydrogen gas, the pressure can be produced by liquid phase.

The analysis of reaction mixtures with GC-MS and GC-FID

All products also were identified by GC-MS, a coupled Agilent 7820A GC-5977B/MSD, equipped with a column Agilent 19091S-433UI (HP-5MS Ultra Inert; 30 m × 250 µm × 0.25 µm; -60 °C-325 °C). An auto-injector was employed to inject the 1 µl of samples at 250 °C and was set to a 50:1 split ratio. Helium was used as carrier gas with flow rate of 1.8 mL min<sup>-1</sup>. The temperature program was set as follows: the oven initially started at 50 °C, held for 2 min, raised to 250 °C at a rate of 20 °C.min<sup>-1</sup>, and held for 10 min at 250 °C. The ion source of the mass spectrometer was set at 280 °C. The peaks were analysed on the basis of retention time and using the NIST database and retention index.

The reaction mixtures were analysed by gas chromatography (GC) using a 6890 N chromatograph system (Agilent) equipped with an HP-5 column (30 m × 0.32 mm × 0.23 mm) using a flame ionization detector (FID) (injector 250 °C, detector 250 °C). The oven initially started at 50 °C, held for 3 min, raised to 250 °C at a rate of 20 °C.min<sup>-1</sup>, and held for 20 min. Response factors of the reaction products were determined with respect to the original starting materials from GC analysis using known compounds in calibration mixtures of specified compositions.

In addition, some samples were analysed with a Hewlett Packard HP 5890 Series II Gas Chromatograph, provided with an EQUITY™-1 (60 m × 0.25 mm × 0.25 µm) column and an FID detector (Supelco Analytical, Bellefonte, PA, USA). The temperature in the injector as

well as in the reactor was 250 °C. The oven temperature program used was from an initial temperature of 50 °C for 5 minute that was increased up to 250 °C with a heating rate of 20 °C.min<sup>-1</sup> and remained constant at that temperature for 10 min.

Calculation of Weight Hourly Space Velocity (WHSV) and space time yield (STY)

$$\text{Weight Hourly Space Velocity (WHSV)} = \frac{g_{(feed)}}{g_{(cat)} \cdot h} (h^{-1})$$

$$\text{Space-time yield (STY)} = \frac{g_{(Levulinic\ acid)}}{g_{(Ruthenium)} \cdot h} (h^{-1})$$

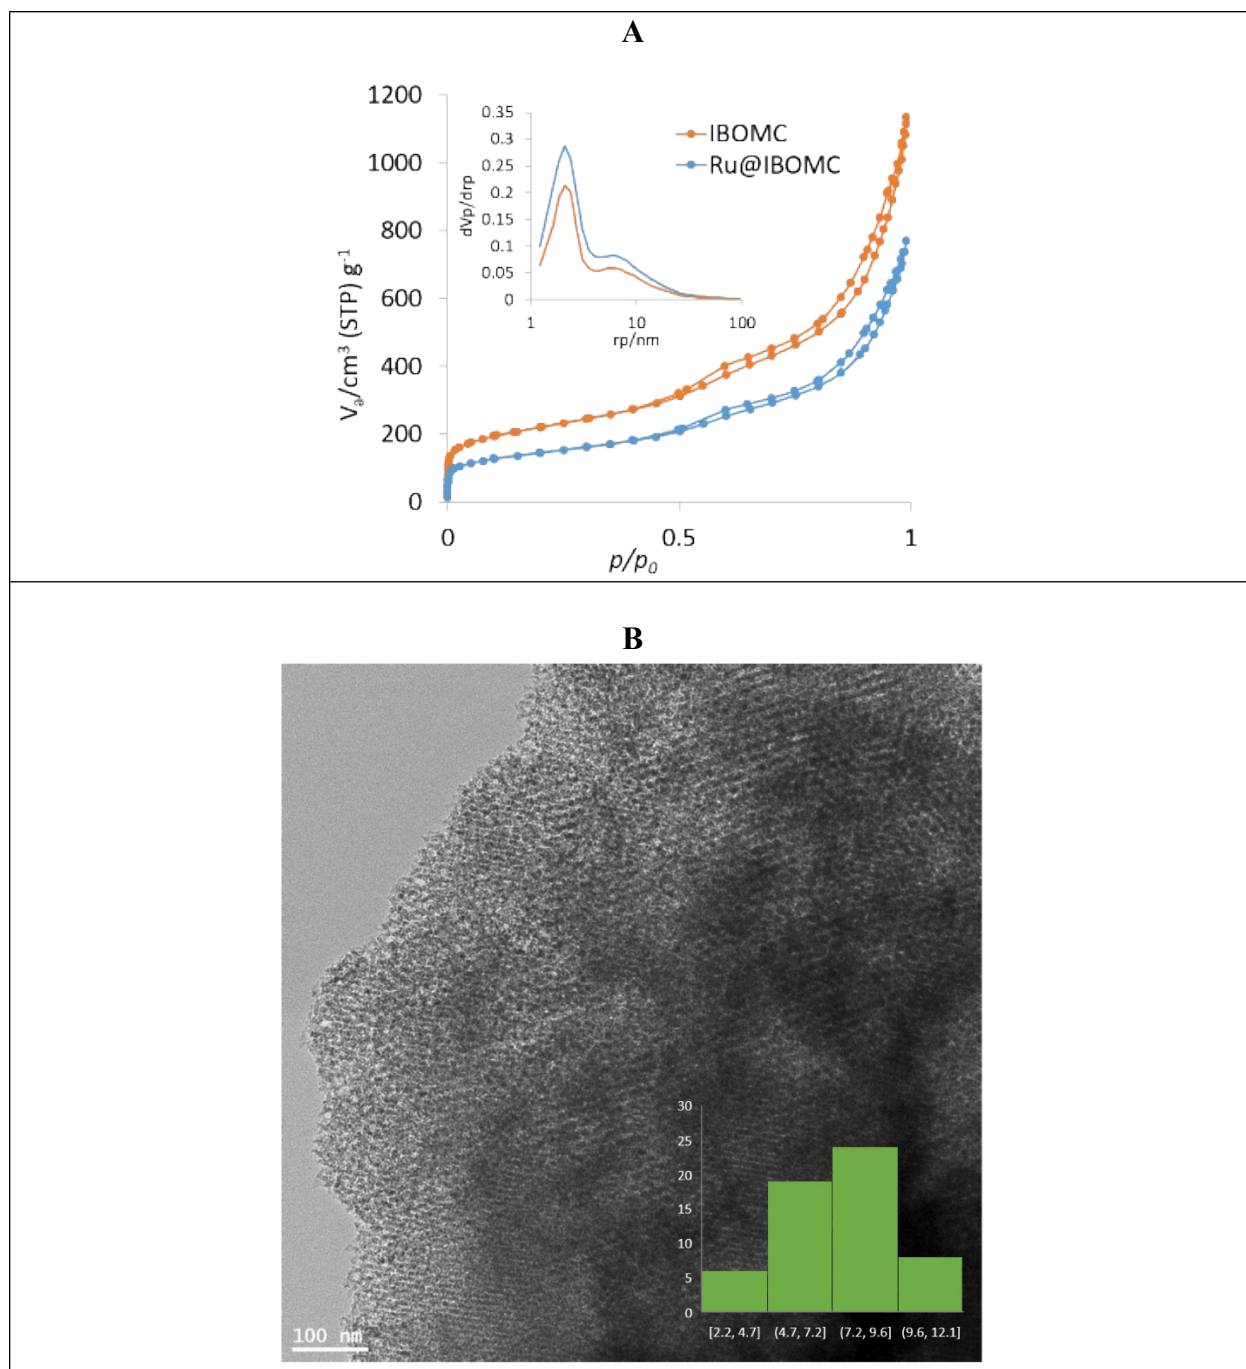

**Figure S 1.** A)  $N_2$  adsorption-desorption isotherms, and pore size distribution curves (evaluated using the DH method) of the synthesized carbon and catalyst (the orange diagram for IBOMC; the blue diagram for Ru@IBOMC), B) TEM of Ru@IBOMC

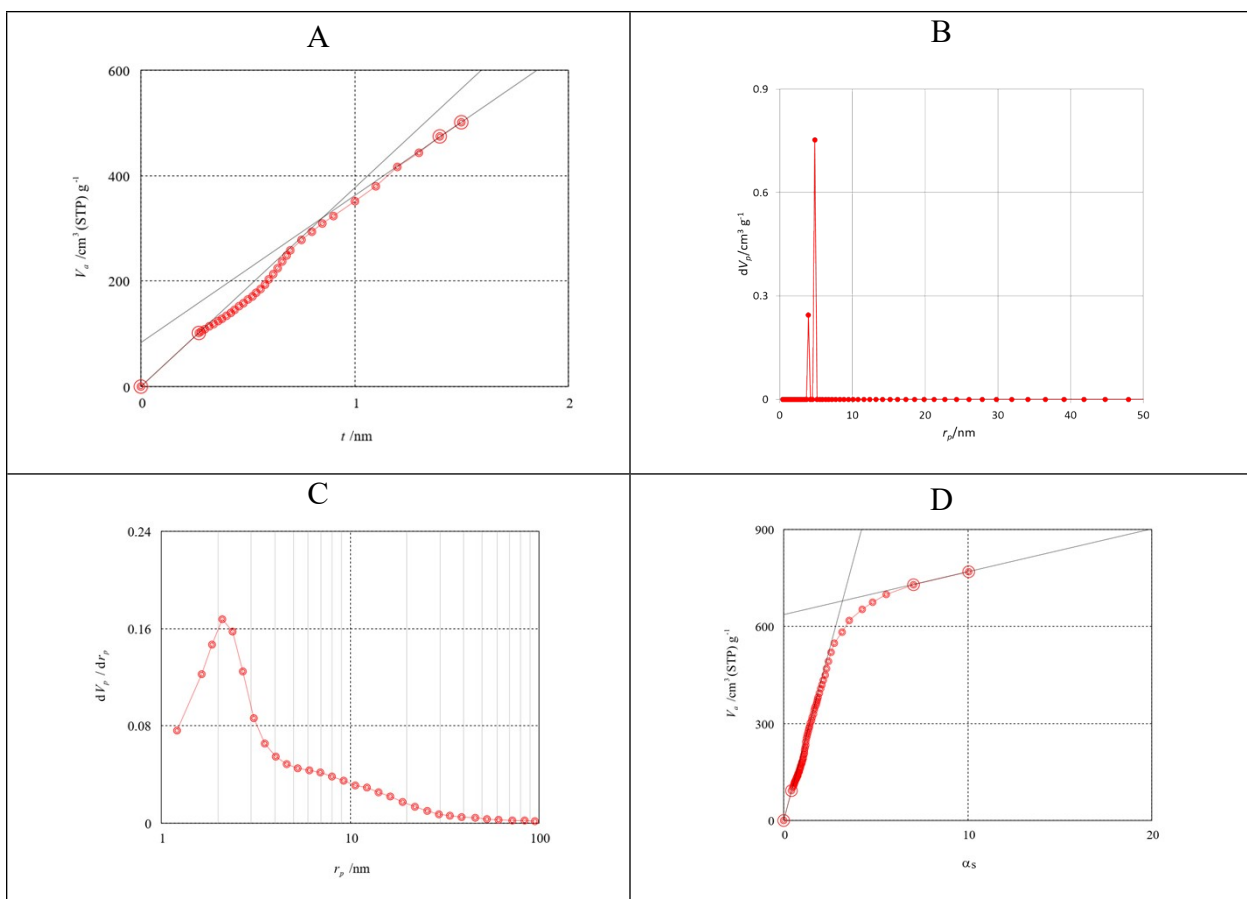

**Figure S 2:** A) t-plot of Ru@IBOMC, B) NLDTF of Ru@IBOMC with PSD of  $r_{p,\text{peak}} = 3.95 \text{ nm}$  and  $4.82 \text{ nm}$ , C) BJH of the catalyst, D) alpha-plot of the catalyst.

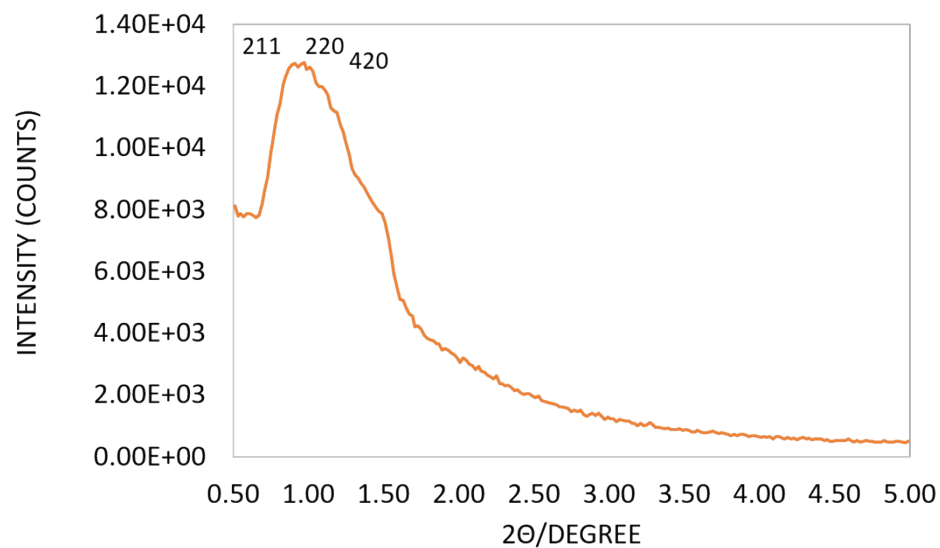

**Figure S 3.** Low angel XRD of IBOMC

Table S1: Low angel XRD peak list of IBOMC

| Pos.[°2Th.] | Height [cts] | d-spacing [Å] | Rel. Int. [%] |
|-------------|--------------|---------------|---------------|
| 0.91 (2)    | 2893 (548)   | 97.474        | 100           |
| 1.49 (1)    | 1387 (129)   | 59.32681      | 47.94         |

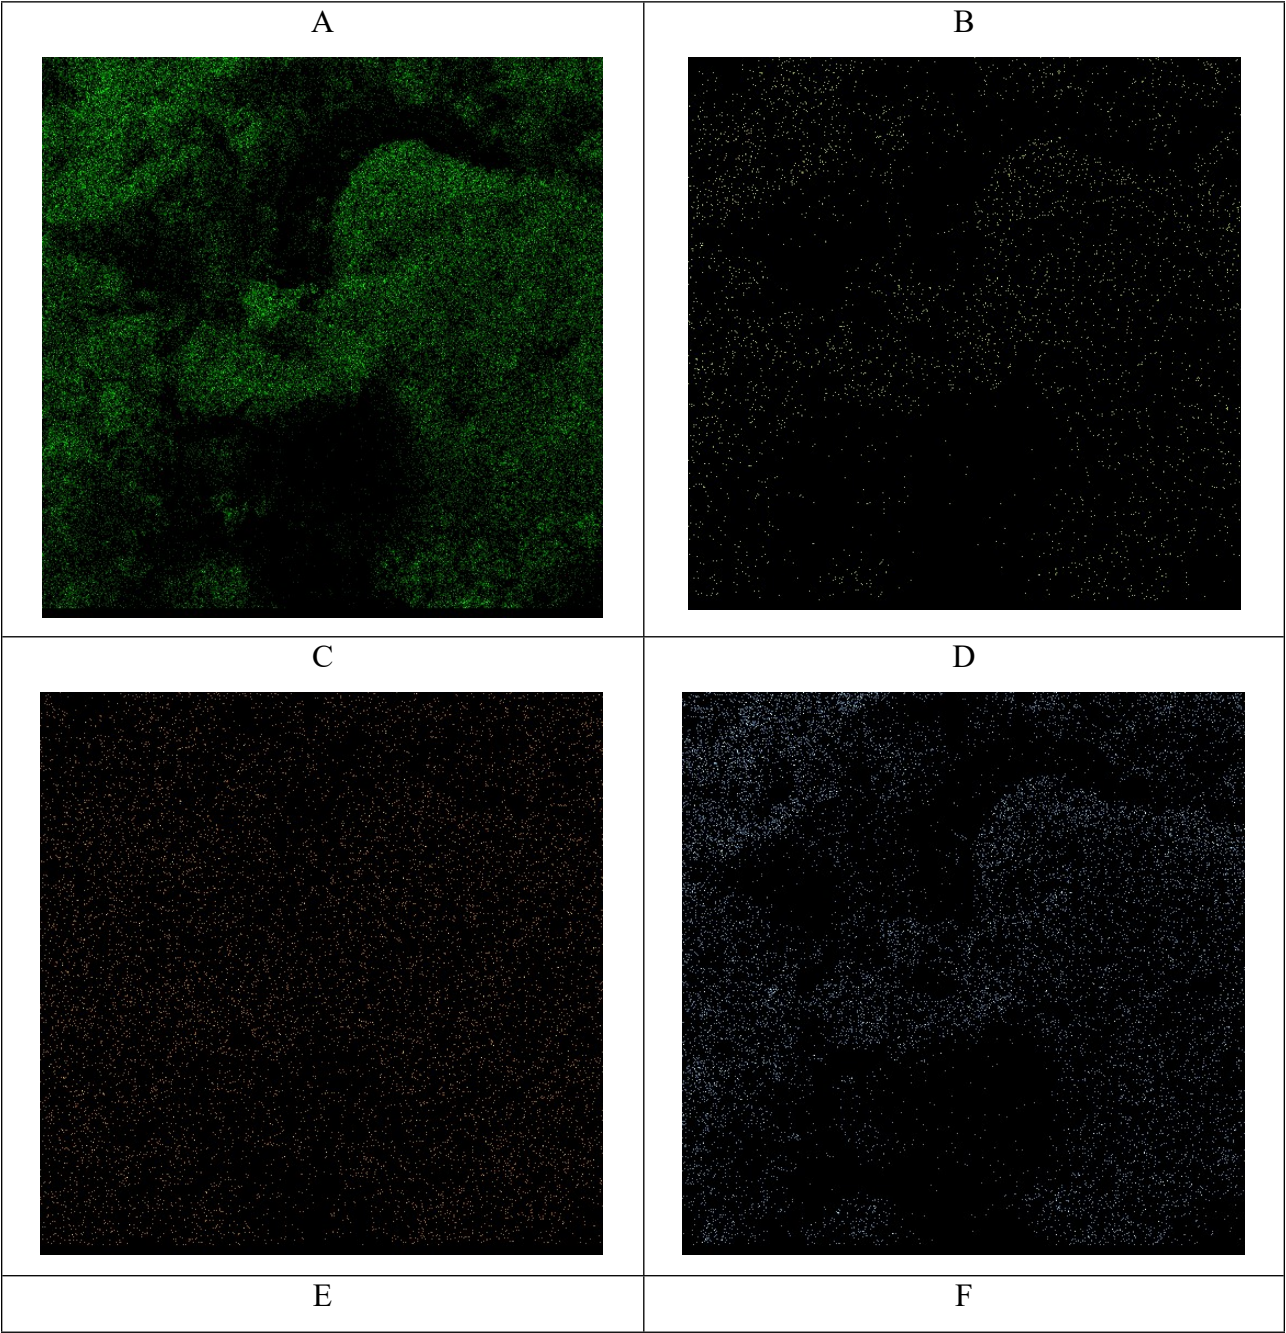

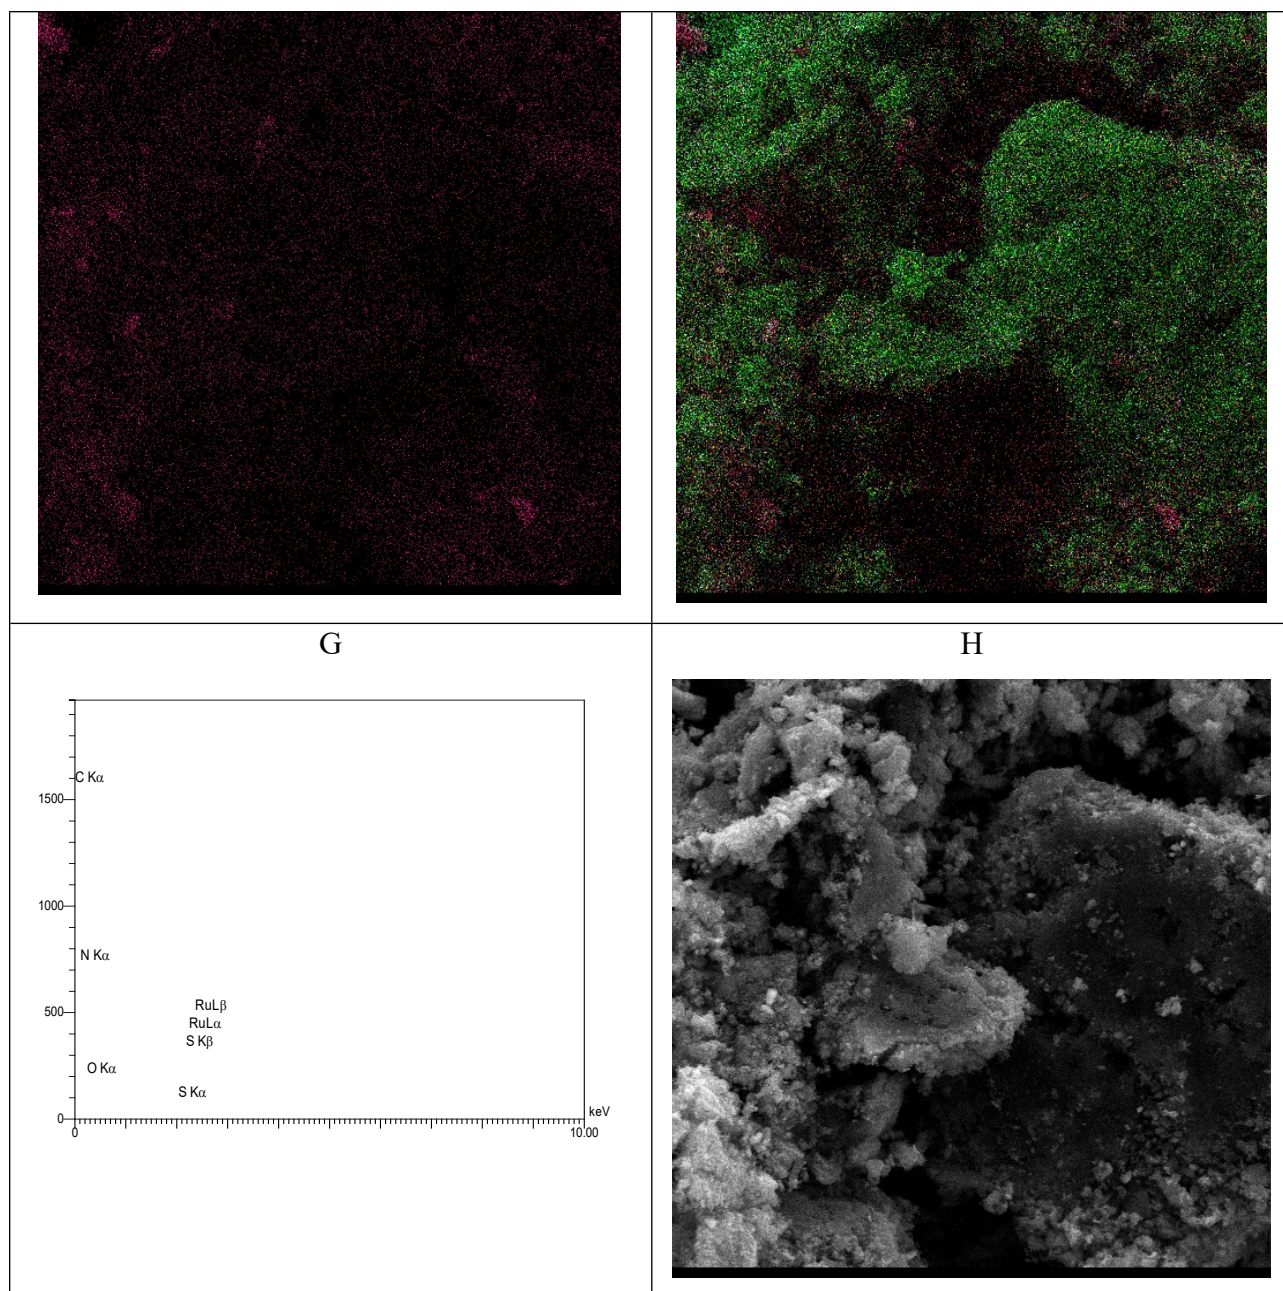

**Figure S 4:** Elemental mapping images of Ru@IBOMC: Dispersion of Carbon element (A), Nitrogen element (B) Sulfur element (C) Oxygen element (D) Ruthenium element (E), and the combine of all elements (F) on the surface of Ru@IBOMC; EDX analysis of Ru@IBOMC (G); SEM of Ru@IBOMC (H).

**Table S 2:** Quantitative EDX Results of Ru@IBOMC

| Elt       | Line | Int   | Error  | K      | Kr     | W%     | A%     | ZAF    | Ox%  | Pk/Bg  | Class | LConf | HConf | Cat# |
|-----------|------|-------|--------|--------|--------|--------|--------|--------|------|--------|-------|-------|-------|------|
| <b>C</b>  | Ka   | 121.8 | 2.9137 | 0.7562 | 0.5792 | 63.67  | 80.69  | 0.9098 | 0.00 | 673.46 | A     | 62.18 | 65.15 | 0.00 |
| <b>N</b>  | Ka   | 3.0   | 2.9619 | 0.0178 | 0.0136 | 7.24   | 7.87   | 0.1880 | 0.00 | 31.19  | A     | 6.17  | 8.31  | 0.00 |
| <b>O</b>  | Ka   | 16.7  | 3.0100 | 0.0318 | 0.0244 | 8.50   | 8.09   | 0.2864 | 0.00 | 34.53  | A     | 7.97  | 9.04  | 0.00 |
| <b>S</b>  | Ka   | 9.2   | 1.5207 | 0.0095 | 0.0073 | 0.79   | 0.37   | 0.9216 | 0.00 | 5.89   | A     | 0.72  | 0.85  | 0.00 |
| <b>Ru</b> | La   | 78.6  | 2.1247 | 0.1848 | 0.1415 | 19.80  | 2.98   | 0.7147 | 0.00 | 19.96  | A     | 19.23 | 20.38 | 0.00 |
|           |      |       |        | 1.0000 | 0.7660 | 100.00 | 100.00 |        | 0.00 |        |       |       |       | 0.00 |

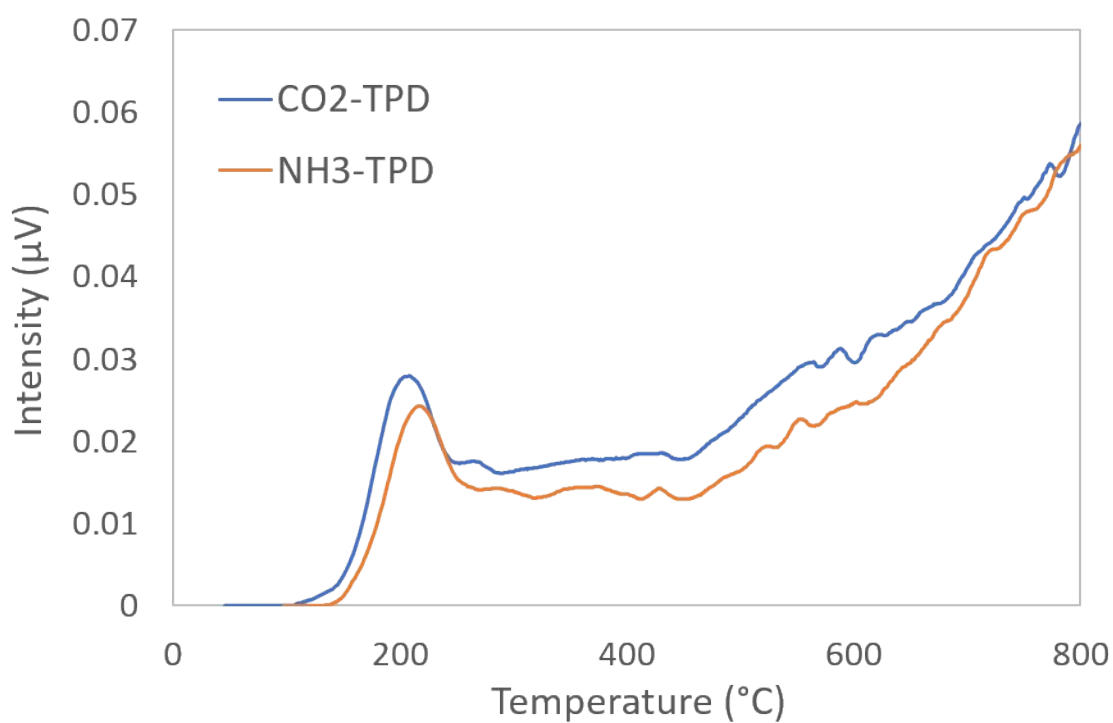

**Figure S 5:** CO<sub>2</sub> and NH<sub>3</sub> TPDs of IBOMC

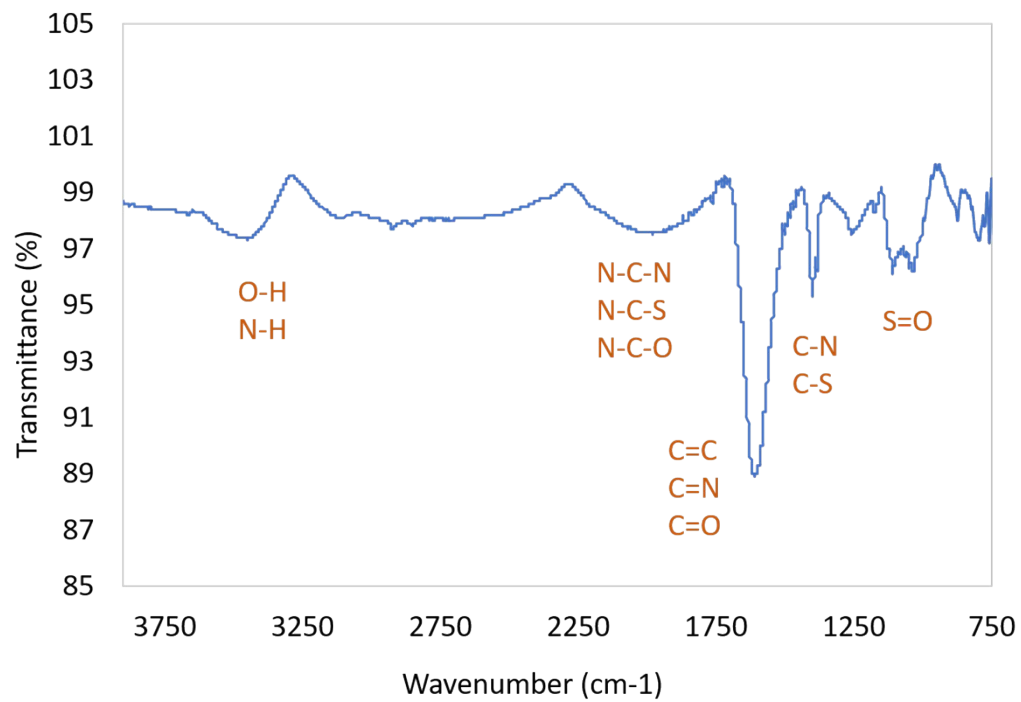

**Figure S 6:** FT-IR of IBOMC

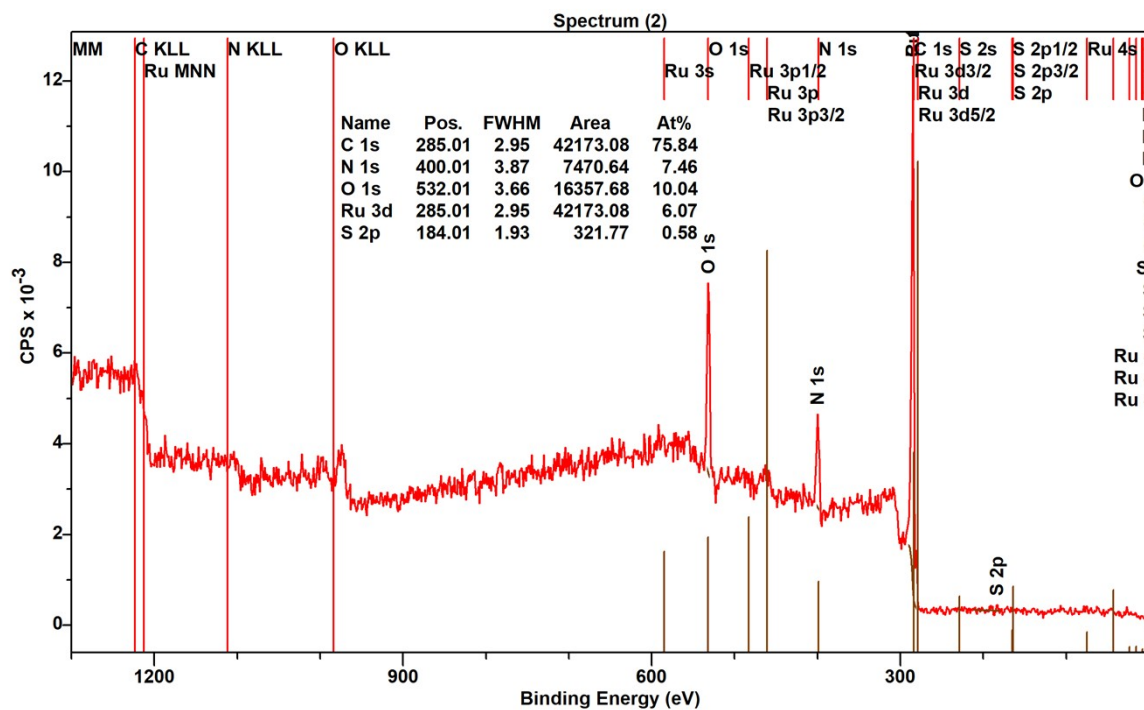

**Figure S 7.** XPS of Ru@IBOMC

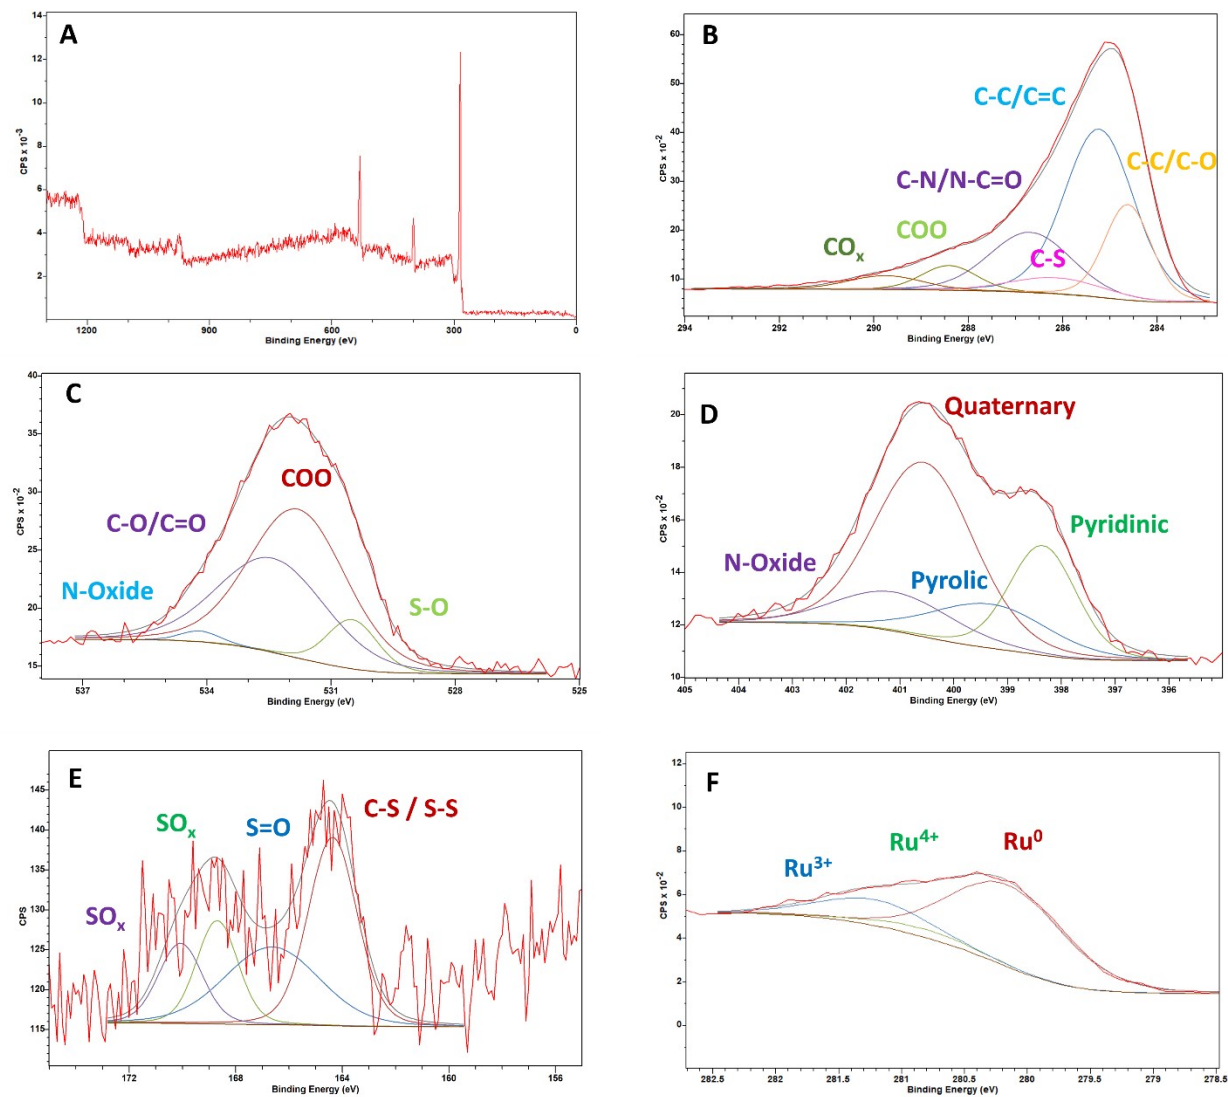

**Figure S 8:** XPS deconvolution of Ru@IBOMC

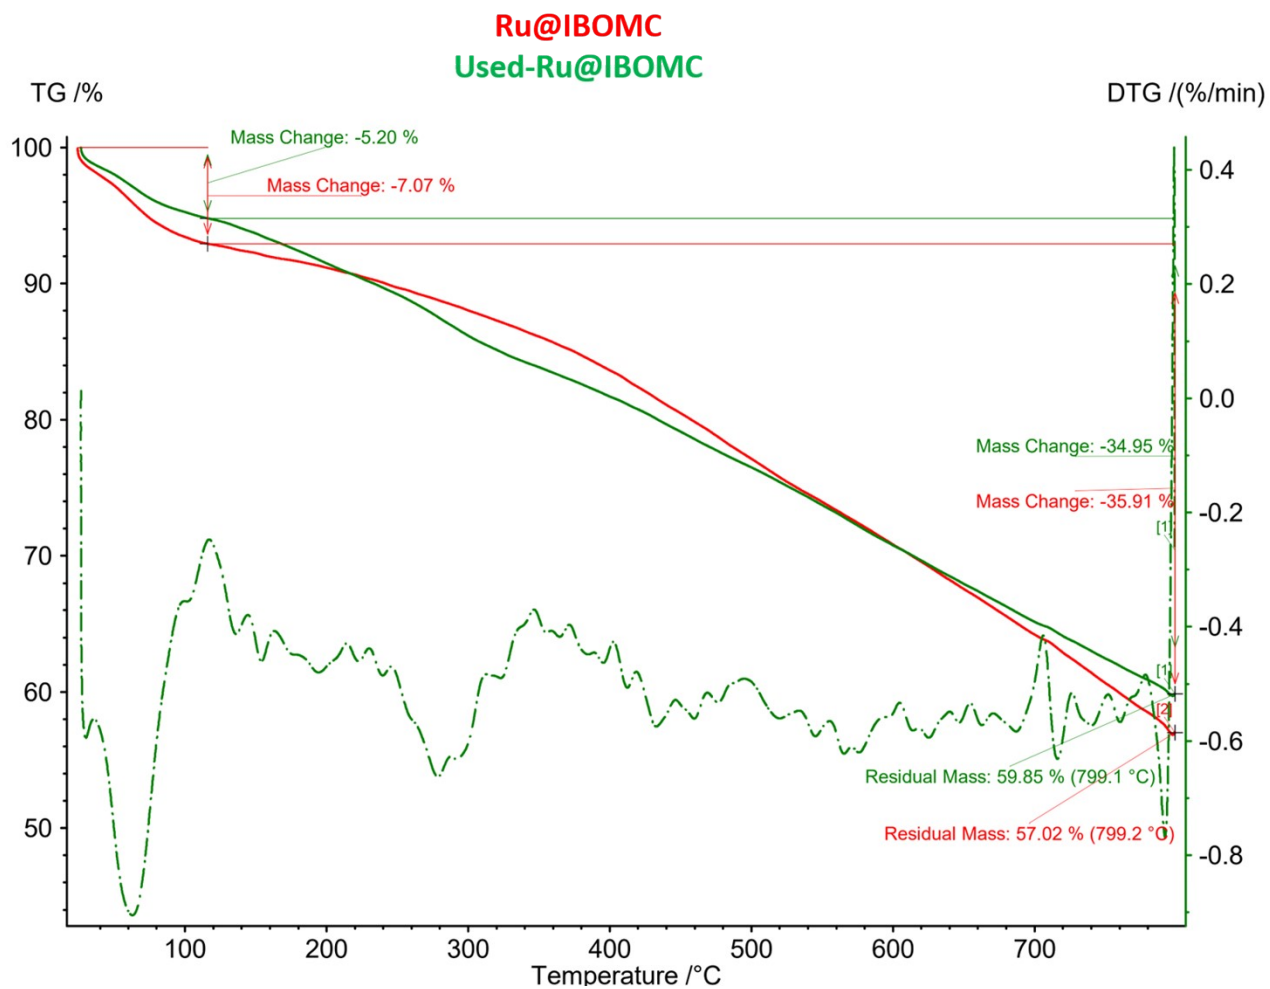

**Figure S 9:** TGA analyses of Ru@IBOMC and used Ru@IBOMC

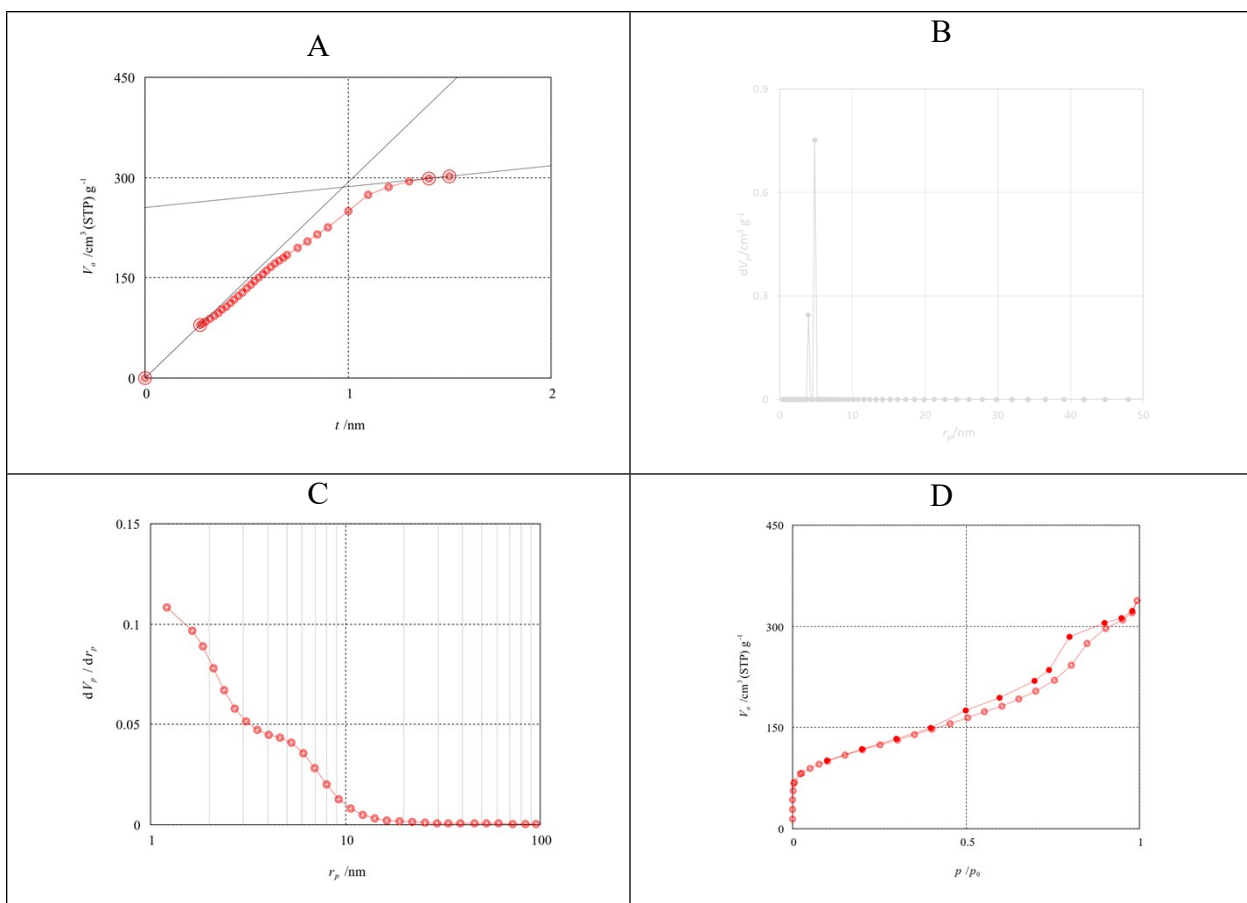

**Figure S 10:** A) t-plot of used-Ru@IBOMC, B) NLDFT of used-catalyst with PSD of  $r_{p,\text{peak}} = 3.95$  nm and 4.82 nm, C) BJH of used-catalyst, D)  $N_2$  adsorption-desorption isotherms of used-catalyst.

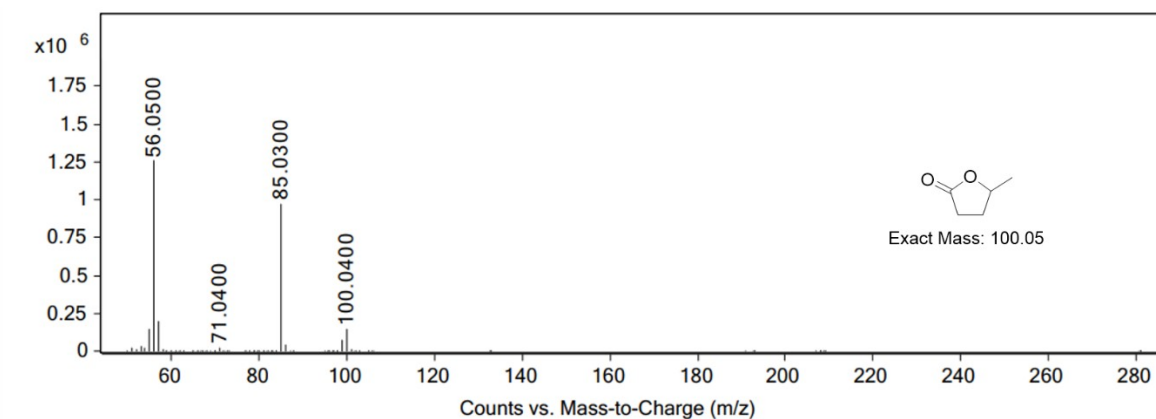

**Peak List**

| m/z    | z | Abund      |
|--------|---|------------|
| 51.03  |   | 22285.73   |
| 53.03  |   | 32432.7    |
| 55.05  |   | 148937.59  |
| 56.05  |   | 1256912.25 |
| 57.04  |   | 192936     |
| 71.04  |   | 23241.19   |
| 85.03  | 1 | 975626     |
| 86.03  | 1 | 46719.63   |
| 99.03  |   | 73991.97   |
| 100.04 |   | 142516.95  |

**Figure S 11.** Detection of GVL using GC Mass for conversion of LA into GVL, and reaction of LA with aniline at 90 °C

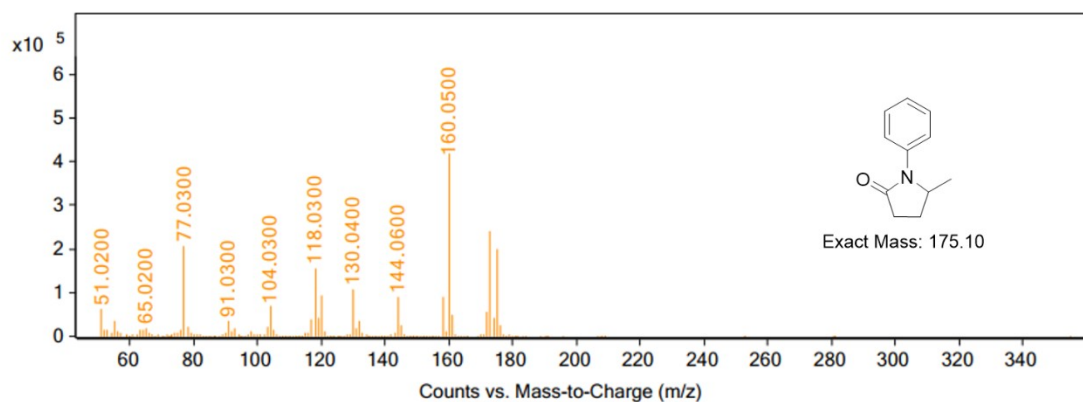

**Peak List**

| m/z    | z | Abund     |
|--------|---|-----------|
| 77.03  |   | 207218.02 |
| 104.03 |   | 67859.24  |
| 118.03 |   | 154798.58 |
| 120.05 | 1 | 92667.89  |
| 130.04 |   | 106708.65 |
| 144.06 |   | 89353.63  |
| 158.04 | 1 | 90971.21  |
| 160.05 | 1 | 417323    |
| 173.05 | 1 | 239591.14 |
| 175.07 | 1 | 200247.94 |

**Figure S 12.** Detection of 5-methyl-1-phenylpyrrolidin-2-one using GC Mass in conversion of LA with aniline at 30 °C

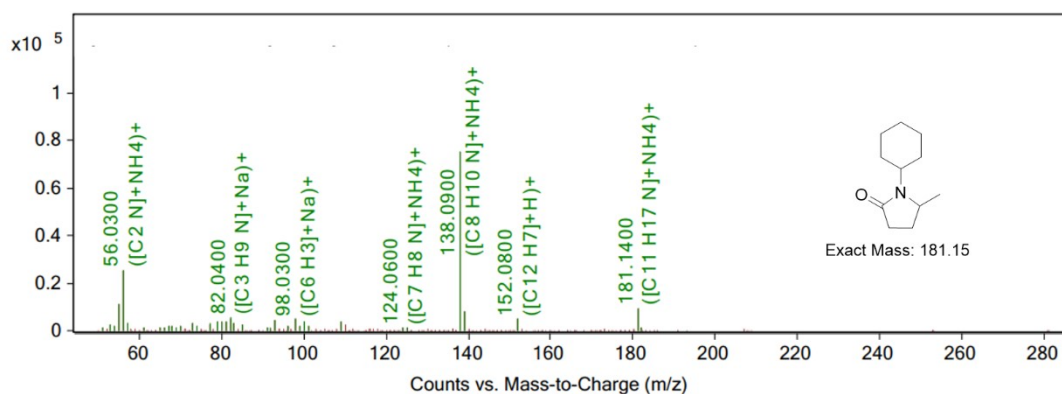

Peak List

| m/z    | z | Abund    | Formula   | Ion      |
|--------|---|----------|-----------|----------|
| 55.03  |   | 11288.78 | C3 H4 N   | (M+H)+   |
| 56.03  |   | 25508.04 | C2 N      | (M+NH4)+ |
| 79.03  |   | 3976.64  | C3 H6 N   | (M+Na)+  |
| 82.04  |   | 5262.73  | C3 H9 N   | (M+Na)+  |
| 93.03  |   | 4513.85  | C4 H8 N   | (M+Na)+  |
| 98.03  |   | 4869.89  | C6 H3     | (M+Na)+  |
| 138.09 | 1 | 75176.09 | C8 H10 N  | (M+NH4)+ |
| 139.1  | 1 | 8072.8   | C8 H10 N  | (M+NH4)+ |
| 152.08 | 1 | 4838.54  | C12 H7    | (M+H)+   |
| 181.14 | 1 | 9447.82  | C11 H17 N | (M+NH4)+ |

Figure S 13. Detection of aromatic lactam using GC Mass in conversion of LA with aniline at 90 °C

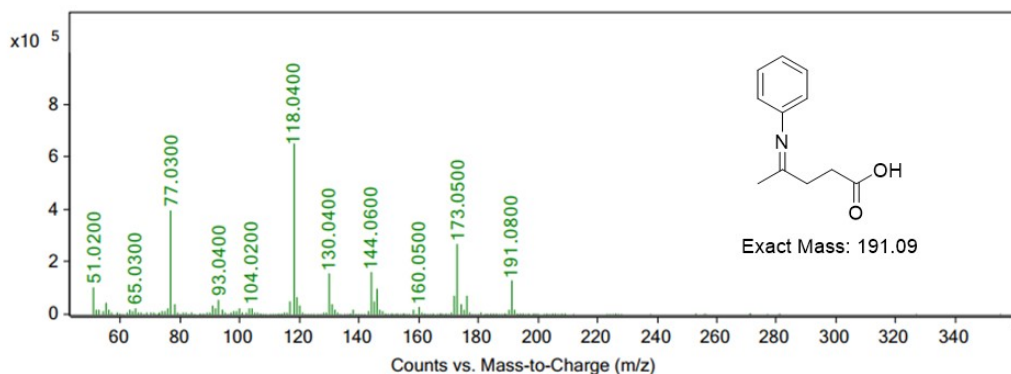

Peak List

| m/z    | z | Abund     |
|--------|---|-----------|
| 51.02  |   | 104100.23 |
| 77.03  | 1 | 396827.06 |
| 118.04 | 1 | 648458.56 |
| 130.04 |   | 153150.03 |
| 144.06 |   | 157864.78 |
| 146.07 | 1 | 96662.36  |
| 172.06 |   | 69263.36  |
| 173.05 | 1 | 264020.84 |
| 176.04 | 1 | 70454.14  |
| 191.08 | 1 | 127390.34 |

Figure S 14. Detection of 4-(phenylimino)pentanoic acid using GC Mass in conversion of LA with aniline at 30 °C

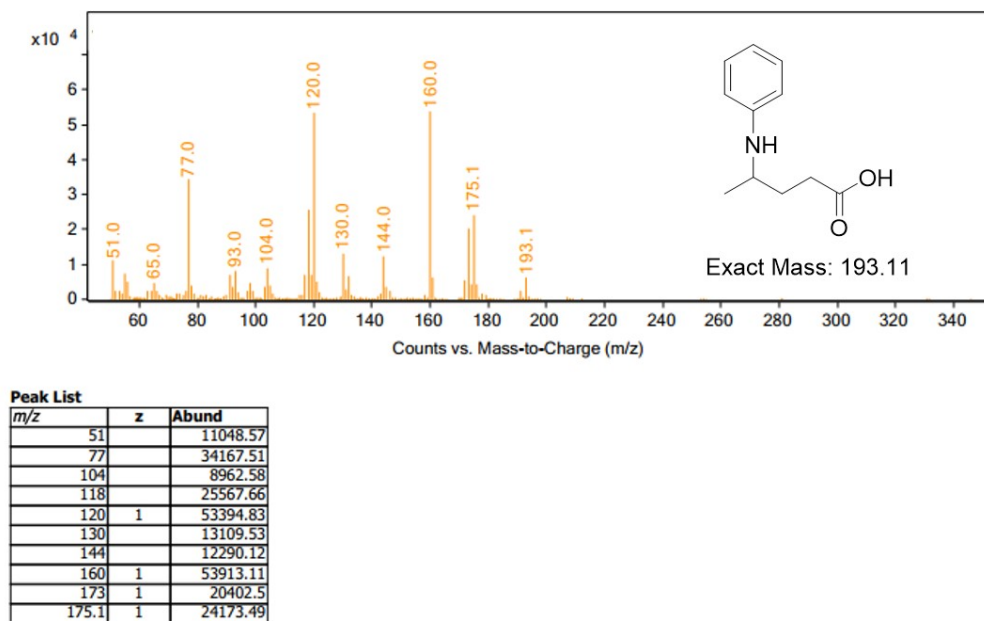

**Figure S 15.** Detection of 4-(phenylamino)pentanoic acid using GC Mass in conversion of LA with aniline at 30 °C

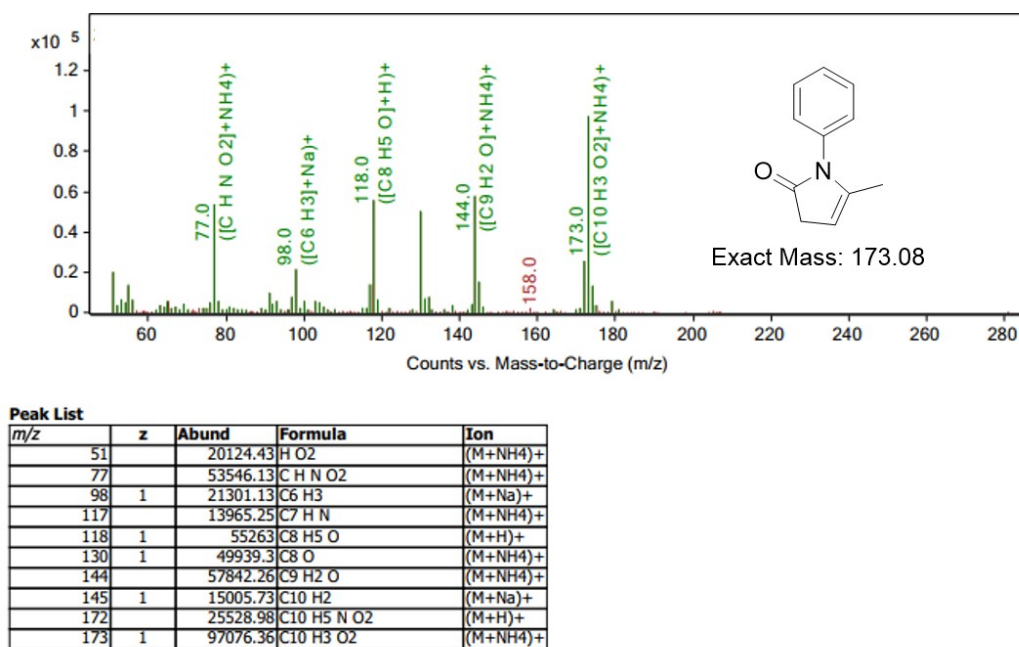

**Figure S 16.** Detection of 5-methyl-1-phenyl-1,3-dihydro-2H-pyrrol-2-one using GC Mass in conversion of LA with aniline at 30 °C

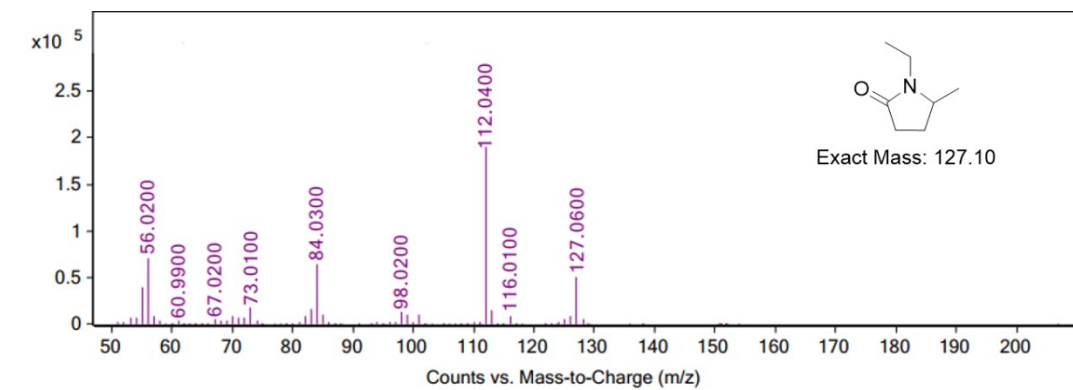

**Peak List**

| m/z    | z | Abund     |
|--------|---|-----------|
| 55.01  |   | 39151.32  |
| 56.02  |   | 70848.02  |
| 73.01  |   | 17052.99  |
| 83.02  |   | 15572.32  |
| 84.03  |   | 64416.23  |
| 85.03  |   | 9670.85   |
| 98.02  |   | 11917.05  |
| 112.04 | 1 | 189529.08 |
| 113.03 | 1 | 13654.58  |
| 127.06 | 1 | 50151.69  |

**Figure S 17.** Detection of 1-ethyl-5-methylpyrrolidin-2-one with GC Mass in conversion of LA with acetonitrile

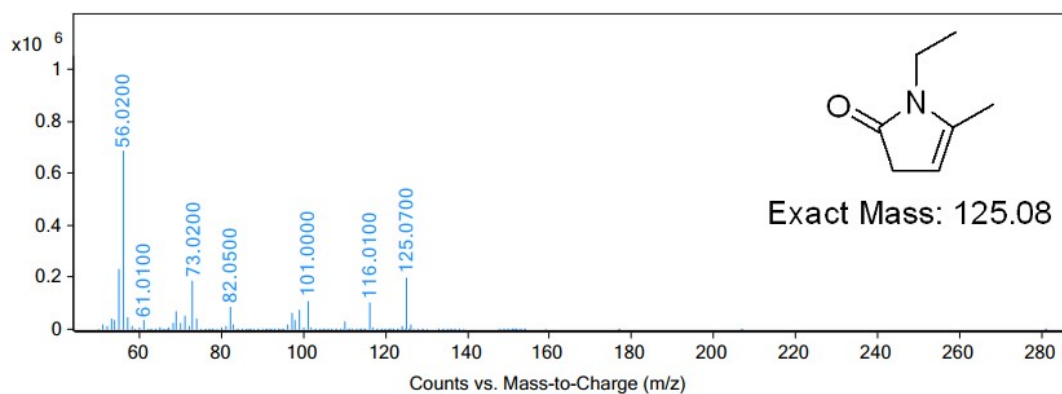

**Peak List**

| m/z    | z | Abund     |
|--------|---|-----------|
| 55.01  |   | 228394.75 |
| 56.02  | 1 | 684832.56 |
| 69.05  |   | 70633.33  |
| 73.02  |   | 187378.84 |
| 82.05  |   | 84803.27  |
| 97.07  |   | 63746.45  |
| 99.02  |   | 75082.64  |
| 101    |   | 107219.32 |
| 116.01 |   | 102316.42 |
| 125.07 | 1 | 199170.88 |

**Figure S 18.** Detection of 1-ethyl-5-methyl-1,3-dihydro-2H-pyrrol-2-one with GC Mass in conversion of LA with acetonitrile

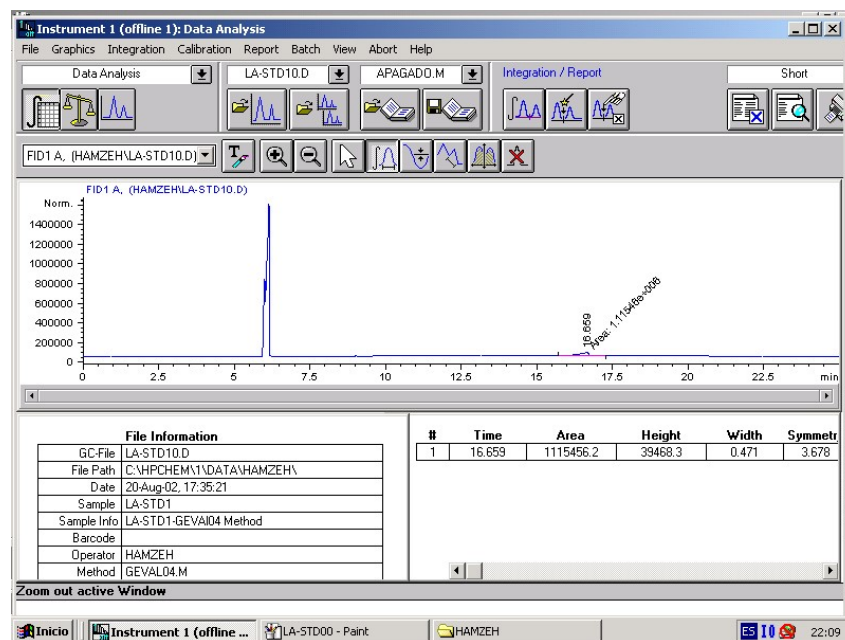

**Figure S 19:** Chromatogram of standard Levulinic acid in GC-FID

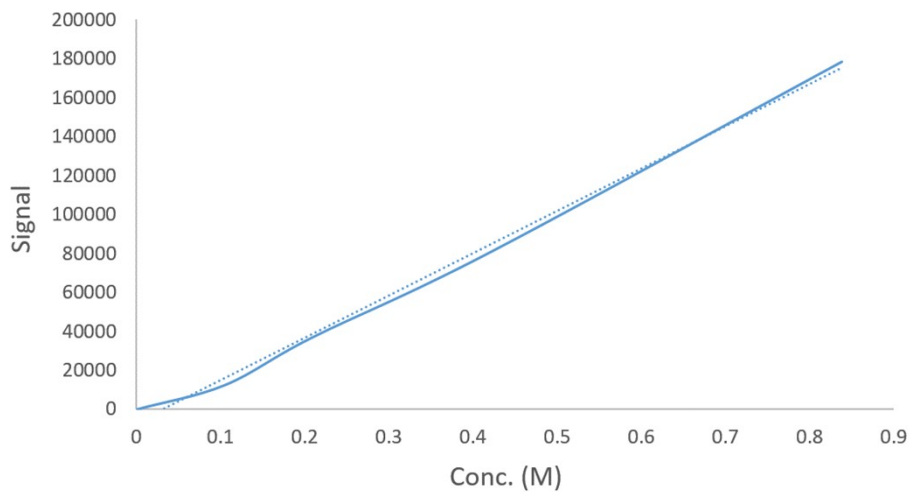

**Figure S 20:** GVL Calibration curve using GC-FID

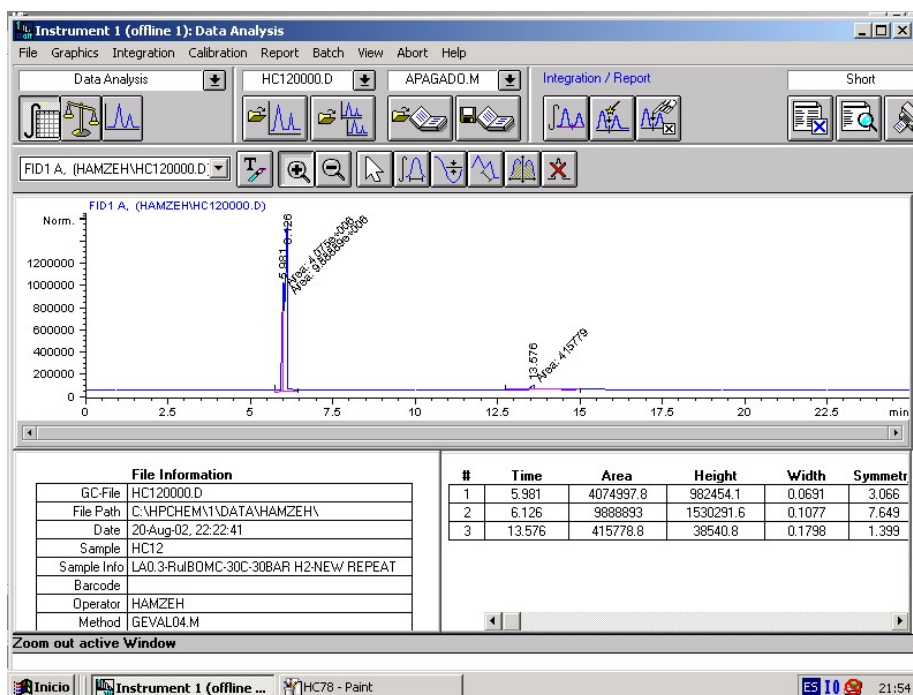

**Figure S 21:** Chromatogram of mixture of reaction after hydrogenation of Levulinic acid at room temperature in GC-FID

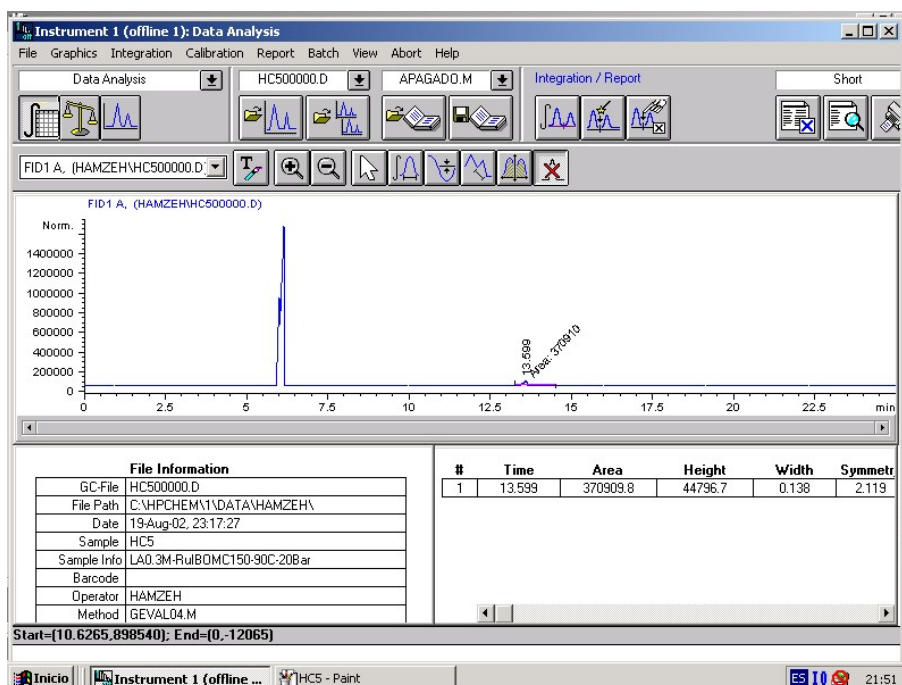

**Figure S 22:** Chromatogram of mixture of reaction after hydrogenation of Levulinic acid at 90 °C in GC-FID

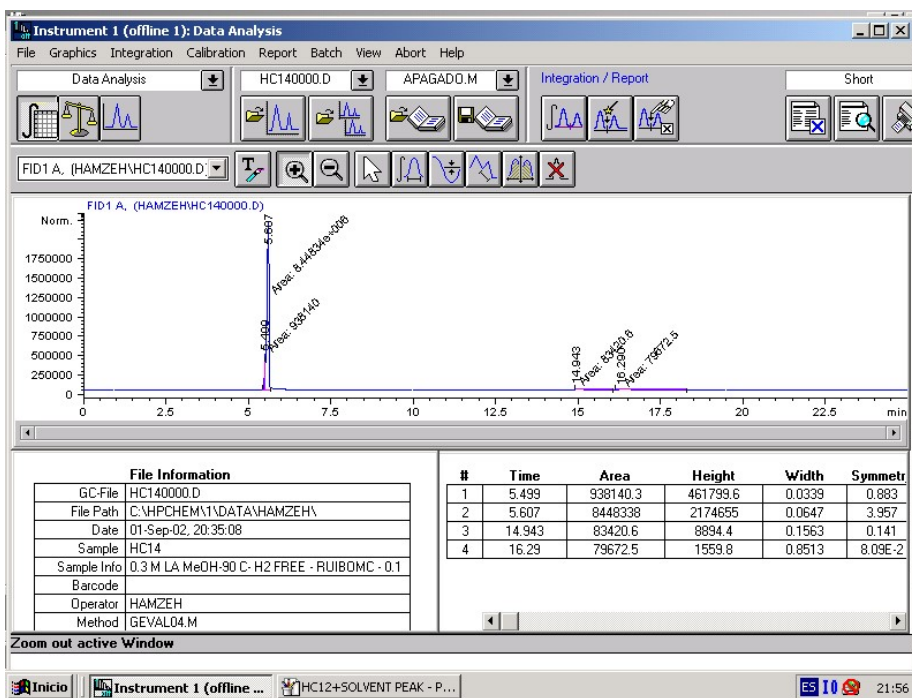

**Figure S 23:** Chromatogram of mixture of reaction after hydrogenation of Levulinic acid at H<sub>2</sub>-free conditions in GC-FID

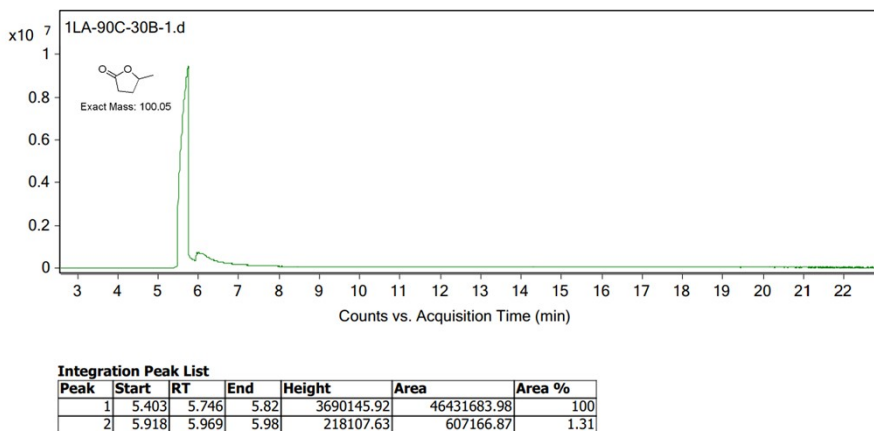

**Figure S 24:** Chromatogram of mixture of reaction after hydrogenation of Levulinic acid in GC-MS

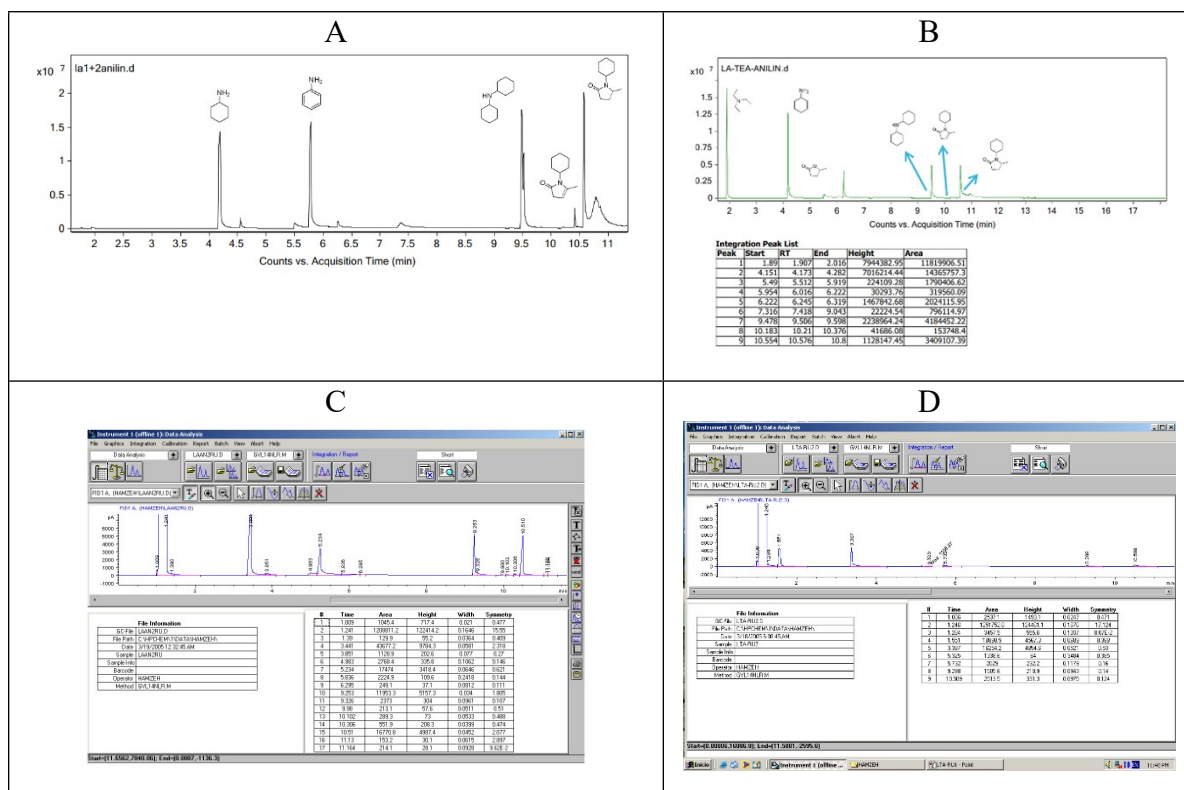

**Figure S 25:** A) Chromatogram of mixture of reaction after hydrogenation of Levulinic acid in the presence of Aniline at 90 °C using GC-MS; B) Chromatogram of mixture of reaction after hydrogenation of Levulinic acid 90 °C in the presence of Aniline and triethylamine as STD in GC-MS; C) Chromatogram of mixture of reaction after hydrogenation of Levulinic acid in the presence of Aniline using GC-FID; D) Chromatogram of mixture of reaction after hydrogenation of Levulinic acid in the presence of Aniline and TEA as STD using GC-FID.

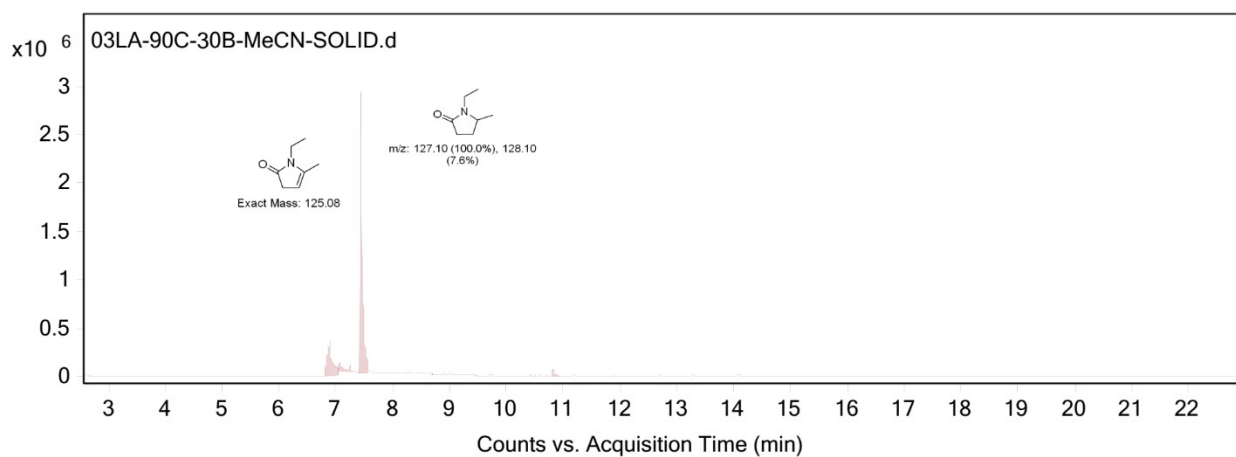

#### Integration Peak List

| Peak | Start  | RT     | End    | Height    | Area       |
|------|--------|--------|--------|-----------|------------|
| 1    | 6.795  | 6.896  | 7.045  | 359950.82 | 2191504.26 |
| 2    | 7.045  | 7.062  | 7.222  | 80862.4   | 349890.3   |
| 3    | 7.222  | 7.245  | 7.342  | 68724.54  | 115657.72  |
| 4    | 7.411  | 7.434  | 7.548  | 2901664.3 | 6582517.11 |
| 5    | 10.793 | 10.815 | 10.959 | 75048.04  | 182562.57  |

**Figure S 26:** Chromatogram of mixture of reaction after hydrogenation of Levulinic acid in the presence of MeCN using GC-MS

#### References

- [1] F. Kleitz, S. H. Choi, R. Ryoo, *Chemical Communications* **2003**, 2136-2137.
- [2] H. H. Veisi, M. Akbari, B. Karimi, H. Vali, R. Luque, *Green Chemistry* **2023**.  
<https://doi.org/10.1039/D3GC00117B>
